# Supplementary material
Source: PubMed Central journal article supplement (PMC4001539)

## Supplemental Figure Legends

### Supplemental Figure 1. VEGF-A level and vascularity are reduced in the adipose tissue of

**diet-induced obese mice.** **A**, The body weight of wild-type mice fed a NC or a HFHS diet ( $n=6$ ) (NC;  $27.75\pm 1.4$ g, HFHS;  $38.5\pm 2.1$ g). **B**, GTT and ITT of mice described in **A**. **C**, BAT/body weight ratio (%) of mice described in **A** ( $n=3-9$ ). **D**, Vascularity of BAT evaluated with isolectin IB4 staining (red). Scale bar = 50  $\mu$ m. The right graphs show vessel number/ adipocyte or vessel number/microscopic field (x400,  $n=4$ ). **E-H**, Levels of VEGF-A evaluated with immunofluorescence and ELISA in BAT (**E** and **F**,  $n=4$ ), and WAT (**G** and **H**,  $n=4-5$ ). Scale bar = 50  $\mu$ m. The right graphs in **E** and **G** show the relative VEGF-A expression area. Data were analyzed by two-tailed Student's *t*-test (**A**, **C**, **E-H**) or ANOVA (**B**, **D**). \* $P<0.05$ , \*\* $P<0.01$ . All values represent the mean  $\pm$  s.e.m.

### Supplemental Figure 2. Temporal changes in VEGF-A and mitochondrial markers in BAT

**of dietary obese model.** **A**, Body weight and BAT/body weight ratio (%) ( $n=6-11$ ), and **B**, hematoxylin and eosin staining of brown adipose tissue (BAT) from a NC- or a HFHS-fed mice maintained on these diets for 1 (1w) or 4 (4w) weeks. Scale bar=50  $\mu$ m. Right graph shows the number of large lipid droplets/microscopic field in BAT (x400,  $n=4$ ) under these conditions. **C**, Vascularity of BAT evaluated with isolectin IB4 staining at different time points on HFHS diet. The graph shows relative vessel number/microscopic field (x400,  $n=4$ ). **D**, VEGF-A level evaluated by quantitative immunofluorescence staining ( $n=4$ ) **E**, Real-time PCR analysis of *Vegfa* and *Kdr* expression in BAT from a NC or a HFHS fed mice maintained on these diet for 1 (1w) or 4 (4w) weeks ( $n=4-10$ ). **F**, Pimonidazole staining in BAT determined by Hypoxyprobe-1 staining. The right graph indicates the pimonidazole positive area ( $n=4$ ). ND indicates not

detected by pimonidazole staining. Scale bar=50  $\mu\text{m}$ . **G**, Real-time PCR analysis of mitochondrial marker expression in BAT ( $n=4-11$ ). For this experiment, the HFHS fed mice (1w, 4w) (**C,D,E,G**) were compared with NC fed mice (1w, 4w), respectively. Data were analyzed by two-tailed Student's *t*-test (**A-G**). \* $P<0.05$ , \*\* $P<0.01$ . All values represent the mean  $\pm$  s.e.m. NS = not significant.

**Supplemental Figure 3. VEGF-A level and vascularity are reduced in the ob/ob genetic**

**model of obesity A**, Body weight and BAT/body weight ratio (%) of WT vs. ob/ob mice ( $n=5-7$ ).

**B**, Hematoxylin and eosin staining of brown adipose tissue (BAT) or white adipose tissue (WAT) from ob/ob and littermate control (WT) mice. Scale bar=50  $\mu\text{m}$ . Right graph shows the number of large lipid droplets/field in BAT (x400,  $n=3-4$ )

**C**, Vascularity of BAT evaluated with isolectin IB4 staining. The graph shows vessel number/field (x400,  $n=4$ ).

**D**, Pimonidazole staining in BAT and WAT of ob/ob and littermate control (WT) mice estimated by Hypoxyprobe-1. The right graph indicates the pimonidazole positive area ( $n=4$ ). Scale bar=50  $\mu\text{m}$ .

**E**, Western blot analysis of VEGF-A in BAT from WT and ob/ob mice. The right graph indicates the quantification normalized to GAPDH expression ( $n=3$ ).

**F**, VEGF-A level in BAT and WAT evaluated with the immunofluorescent staining ( $n=3-4$ )

**G**, Real-time PCR expression of *Vegfa* and *Kdr* in BAT and WAT of WT and ob/ob mice ( $n=7-8$ ).

**H**, Real-time PCR expression of mitochondrial markers in BAT of WT and ob/ob mice ( $n=7-8$ ).

**I**, Acute cold tolerance test of ob/ob mice and littermate control (WT) ( $n=4$ ). Data were analyzed by two-tailed Student's *t*-test (**A,B,E,F,H**) or ANOVA (**C, D, G, I**). \* $P<0.05$ , \*\* $P<0.01$ . All values represent the mean  $\pm$  s.e.m.

**Supplemental Figure 4. VEGF-A level and vascularity are reduced in the adipose tissue of aP2-Cre<sup>+/-</sup> Vegfa<sup>flox/flox</sup> mice.** **A, B**, Body weight and food intake of aP2-Cre<sup>+/-</sup> Vegfa<sup>flox/flox</sup> (KO) and wild-type littermates ( $n=4-6$ ). **C-F**, Assessment of VEGF-A in BAT and WAT using immunofluorescence (**C, E**) and ELISA (**D, F**) ( $n=4$ , scale bar= 50  $\mu\text{m}$ ). The right graphs in **C** and **E** show the relative immunofluorescence area of VEGF-A staining. **G**, Vascularity of BAT and WAT from mice prepared in **A** evaluated with staining for isolectin IB4 conjugates (red). Scale bar = 50  $\mu\text{m}$ . The right graph shows vessel number/field (x400,  $n=4$ ). **H**, Pimonidazole staining in BAT estimated by Hypoxyprobe-1. The graph indicates the pimonidazole positive area ( $n=4-7$ ). **I**, Adipocyte size in WAT measured with hematoxylin and eosin staining as shown in Fig. 2D. Two hundred adipocytes were randomly selected for the measurement ( $n=4$ ). **J**, WAT/body weight ratio of mice prepared in **A** ( $n=5-6$ ). **K**, Gross morphology of BAT. **L**, BAT/body weight ratio of mice described in **A** ( $n=4-5$ ). **M**, Number of large lipid droplets/field (x400,  $n=4$ ) measured with BAT prepared in Fig. 2D. Data were analyzed by two-tailed Student's *t*-test (**A-F, H-J, L, M**) or ANOVA (**G**). \* $P<0.05$ , \*\* $P<0.01$ . All values represent the mean  $\pm$  s.e.m.

**Supplemental Figure 5. BAT-specific delivery of Vegfa by adenovirus injection.** **A**, Immunohistochemical detection of  $\beta$ -galactosidase in BAT injected with PBS or ad-*LacZ* two weeks prior to obtaining the samples. The right graph demonstrates the ratio of  $\beta$ -gal positive nuclear ( $n=4$ ). Four fields were randomly selected from each sample for 4 samples. **B**, Western blot analysis of Myc-tagged VEGF-A in BAT of mice injected with ad-*lacZ* (Con) or ad-*Vegfa* (*Vegfa*) one week prior to obtaining the sample. The right graph shows quantification of VEGF-A expression ( $n=3$ ). **C**, isolectin IB4 staining was performed to assess the vascularity in the BAT

of mice fed NC and HFHS diets, as described in Fig. 3A. Scale bar = 50  $\mu$ m. **D**, The graph shows vessel number/field (x400,  $n=4$ ) of isolectin IB4 staining shown in **C**. Data were analyzed by two-tailed Student's *t*-test (**A**, **B**) or ANOVA (**D**). \* $P<0.05$ , \*\* $P<0.01$ . All values represent the mean  $\pm$  s.e.m.

**Supplemental Figure 6. Analysis of Vegfa delivery to BAT.** **A**, Immunofluorescence analysis of vessel leakage evaluated with FITC-CM-Dextran in BAT of mice 2 weeks after the injection of ad-*Vegfa* (*Vegfa*) or a control adenoviral vector (Con) into BAT. Lipopolysaccharides (LPS) was used as a positive control. Scale bar = 50  $\mu$ m. The right graph indicates FITC positive area per field (x200,  $n=3-4$ ). **B**, **H**, Real-time PCR analysis of *Emr1*, *Tnf* and *Ccl2* in BAT (**B**) (compared in NC-fed mice) or WAT (**H**) from mice described in Fig. 3A ( $n=3-6$ ). **C**, Plasma VEGF-A expression evaluated with ELISA in mice ( $n=16-17$ ). **D**, Western blot analysis of VEGF-A transgene and Myc-Tag in WAT of mice described in Fig. 3A. Under the probe conditions, endogenous VEGF-A levels in WAT could not be determined. HEK293 cells infected with ad-*lacZ* (Con) or ad-*Vegfa* (*Vegfa*) were used as controls, respectively. **E**, Immunofluorescent staining for detecting vessels (Isolectin IB4, green) and adipocytes (Bodipy-TR, red) in WAT of mice described in Fig. 3A. Scale bar = 100  $\mu$ m. **F**, The graph shows vessel number/field (x400,  $n=4$ ) of isolectin IB4 staining for WAT described in Supplemental Fig. 5C ( $n=4$ ). **G**, Hematoxylin and eosin staining of WAT from mice prepared in Fig. 3A. Scale bar = 50  $\mu$ m. **I-K**, WAT weight (**I**), Body weight (**J**) and food intake (**K**) of mice prepared in Figure 3A ( $n=3-11$ ). Data were analyzed by two-tailed Student's *t*-test (**B**, **C**, **K**) or ANOVA (**A**, **F**, **H-J**). \* $P<0.05$ , \*\* $P<0.01$ . All values represent the mean  $\pm$  s.e.m.



**Supplemental Figure 7. Vegfa delivery prevents the whitening of BAT and improves glucose metabolism in aP2-Cre<sup>+/-</sup> Vegfa<sup>flox/flox</sup> mice.** The BAT of aP2-Cre<sup>+/-</sup> Vegfa<sup>flox/flox</sup> (KO) and wild-type mice (WT) injected with ad-*lacZ* (Con) or ad-*Vegfa* (Vegfa), three weeks prior to obtaining the samples. **A**, Western blot analysis of VEGF expression in BAT. The graph below shows quantification of VEGF-A expression ( $n=3$ ). **B**, Immunofluorescent staining for vessel detection (Isolectin IB4, green) and adipocytes (Bodipy-TR, red) in BAT from aP2-Cre<sup>+/-</sup> Vegfa<sup>flox/flox</sup> (KO) and wild-type mice after the injection of ad-*Vegfa* (Vegfa) or control (Con) adenovirus. Scale bar = 100  $\mu$ m. **C**, Real-time PCR analysis of *Kdr* expression in BAT of mice ( $n=3-10$ ). **D**, Hematoxylin and eosin staining of BAT from WT and KO mice injected with ad-*Vegfa* or control. Scale bar=50  $\mu$ m. Right graph shows the number of large lipid droplets/field ( $n=4$ ). **E**, Real-time PCR analysis of *ND5*, *Ndufa* and *Ppargc1a* expression in BAT of the different experiments sets of mice ( $n=3-10$ ). **F**, Acute cold tolerance test for the different experimental sets of mice ( $n=3-4$ ). **G**, GTT and ITT ( $n=3-11$ ) and **H**, **I**, WAT weight (**H**) and body weight (**I**) ( $n=4-7$ ) of the different experimental sets of mice. Data were analyzed by ANOVA (**A**, **C**, **D-I**). \* $P<0.05$ , \*\* $P<0.01$ . All values represent the mean  $\pm$  s.e.m.

**Supplemental Figure 8. Mitochondrial dysfunction and autophagic responses in BAT from obese and VEGF-deficient mice.** **A**, **C**, Relative quantification of MitoSOX (**A**) or MitoRed (**C**) labeling in isolated mitochondria extracted from BAT of NC- or HFHS-fed mice described in Fig. 4A,B ( $n=4-5$ ). **B**, **D**, FACS analysis of isolated mitochondria extracted from BAT of aP2-Cre<sup>+/-</sup> Vegfa<sup>flox/flox</sup> (KO) and wild-type mice (WT). Mitochondrial labeling was carried out with MitoSOX (**B**) or MitoRed (**D**). The right graphs show the relative quantification ( $n=3-5$ ). **E**, Immunofluorescence staining for mitochondrial membrane protein Tom20 (green) and

autophagosomal membrane protein LC3 (red) at x3000 magnification in BAT from aP2-Cre<sup>+/-</sup> *Vegfa*<sup>flox/flox</sup> (KO) mice. Arrows show double stained puncta. Scale bar = 3 μm. Right graph shows the frequency of puncta double-stained with Tom20 and LC3 measured on 10 random fields (observed at x3000 magnification, *n*=3). **F**, Real-time PCR analysis of *Bnip3* and *Map1lc3b* expression in BAT of mice prepared in WT and KO mice (*n*=4-5). **G**, Quantification of immunofluorescence staining showing the numbers of puncta of Tom20 co-localizing with autophagosomal membrane protein LC3 in BAT from WT and KO mice whose BAT were injected with ad-*Lacz* (Con) or ad-*Vegfa* (*Vegfa*). The puncta were measured on 10 random fields observed at x3000 magnification (*n*=4-5). **H**, Real-time PCR analysis of *Bnip3* and *Map1lc3b* expression in BAT (*n*=4-7). Data were analyzed by two-tailed Student's *t*-test (**A-F**) or ANOVA (**G, H**). \**P*<0.05, \*\**P*<0.01. All values represent the mean ± s.e.m.

**Supplemental Figure 9. ROS production and autophagic activity are increased in brown adipocytes during hypoxic stress ex vivo and in vitro.** **A-E**, Analysis of BAT cultured *ex vivo* under normoxic and hypoxic conditions (1% O<sub>2</sub> for 12 hr unless otherwise mentioned). **A, B**, FACS analysis for isolated mitochondria extracted from BAT of wild type mice that were cultured *ex vivo* under normoxic or hypoxic (6 hr) conditions and stained with MitoSOX (**A**) and MitoRed (**B**). The graphs at right show the relative quantification (*n*=3-4). **C**, Quantitative analysis of western blots measuring levels of LC3A/B-II expression (*n*=3). **D, E**, Real-time PCR analysis under 12hr (**D**) or 24 hr (**E**) hypoxic stress (*n*=3). **F-M**, Analysis of the cultured brown adipocyte cell line under normoxic and hypoxic conditions (1% O<sub>2</sub> for 12 hr unless otherwise mentioned). **F, G**, Immunofluorescence staining under normoxic or hypoxic (1% O<sub>2</sub> for 6 hr) conditions. **F**, MitoSOX positive mitochondria are indicated by white arrows. The right graph

shows quantification of MitoSOX-positive puncta ( $n=3-4$ ). Scale bar = 10  $\mu\text{m}$ . **G**, Relative staining of functional mitochondria (MitoRed) and total mitochondria (Mito Tracker Green FM (MitoGreen)). Scale bar = 10  $\mu\text{m}$ . **H**, The graph shows quantification of MitoRed positive area in **G** ( $n=3-4$ ). **I**, Quantification of Western blot analysis of LC3A/B-II expression ( $n=3$ ). **J**, Immunofluorescent staining showing mitochondrial membrane protein Tom20 (green) co-localizing with autophagosomal membrane protein LC3 (red). Scale bar = 3  $\mu\text{m}$ . **K**, The graph shows the numbers of puncta double stained with Tom20 and LC3 for **J** ( $n=3-4$ ). **L**, **M**, Real-time PCR analysis under 24hr hypoxic stress ( $n=4-5$ ). Data were analyzed by two-tailed Student's *t*-test. \* $P<0.05$ , \*\* $P<0.01$ . All values represent the mean  $\pm$  s.e.m.

**Supplemental Figure 10. Hypoxia induced Hif1 $\alpha$  expression does not contribute to VEGF induction.** **A**, **B**, Immunohistochemical staining for Hif1 $\alpha$  expression in BAT and WAT of NC- or HFHS-fed mice (**A**) or the brown adipocyte cell line cultured under normoxic and hypoxic conditions (1% O<sub>2</sub> for 24 hr) (**B**). The right graph indicates the degree of Hif1 $\alpha$  induction ( $n=3-8$ ). Scale bar = 50  $\mu\text{m}$ . **C-F**, Real-time PCR analysis of *Hif1 $\alpha$* , *Vegfa*, *Bnip3* and *ND5* expression in differentiated brown adipocyte line transduced with ad-*Hif1 $\alpha$*  (Hif1 $\alpha$ ) or a control adenoviral vector (Con) for 48 hr ( $n=3-6$ ). **G-K**, Real-time PCR analysis of *Hif1 $\alpha$* , *Vegfa*, *Bnip3*, *ND5*, *Eln* and *Lox* expression in BAT of WT, NC-fed mice injected with ad-*Hif1 $\alpha$*  (Hif1 $\alpha$ ) or a control adenoviral vector (Con) 2 weeks prior to obtaining samples ( $n=4-10$ ). **L**, Real-time PCR analysis of *Eln* and *Lox* in BAT from mice fed NC or HFHS diet ( $n=7$ ). Data were analyzed by two-tailed Student's *t*-test (**B-L**) or ANOVA (**A**). \* $P<0.05$ , \*\* $P<0.01$ . All values represent the mean  $\pm$  s.e.m.

**Supplemental Figure 11. Regulation of VEGF-A and *Adrb1* and *Adrb3* expression.** **A,B,** ELISA measurement of FFA in BAT ( $n=4$ ) of mice fed a NC or a HFHS diet for 8 or 1 week. **C-K,** Analysis of the cultured brown adipocyte cell line treated with palmitic acid (500  $\mu\text{M}$  for 48 hr) or normoxic and hypoxic stress (1%  $\text{O}_2$  for 24 hr unless otherwise mentioned). **C, D,** VEGF-A level as evaluated by western blot analysis (**C**) or real-time PCR (**D**) ( $n=4$ ). The western blot was normalized to tubulin expression ( $n=3$ ). **E,** Real-time PCR analysis of *Adrb1* and *Adrb3* expression ( $n=5-7$ ). **F, G, J,** Western blot analysis of the ADRB1 (**F**), ADRB3 (**G**) and pPKA (**J**). The right graphs indicate the quantification expression of ADRB1 and 3 relative to GAPDH loading control or pPKA relative to PKA ( $n=3$ ). **H, I,** Radioligand binding assay showing the reduced level of  $\beta 1$  and  $\beta 3$ -adrenergic receptor under hypoxic condition. [ $^3\text{H}$ ]-(-)-CGP-12177 was used at a concentration of 0.1-2.5nM when examining the high-affinity  $\beta 1$ -adrenoreceptor site (**H**) and 0.1-100nM for the low-affinity  $\beta 3$ -adrenoreceptor site (**I**).  $\beta 1$ -adrenoreceptor antagonist CGP20712A (10 $\mu\text{M}$ ),  $\beta 3$ -adrenoreceptor antagonist SR59230A (10 $\mu\text{M}$ ) was used respectively to define specific binding ( $n=8-9$ ). **J,** Western blot analysis of phosphorylated protein kinase A (pPKA Thr197) and total PKA. The right graphs indicate the quantification expression of pPKA relative to PKA ( $n=3$ ). **K,** ELISA measurement of cAMP ( $n=3-6$ ). Cells were treated with 0.1-100  $\mu\text{M}$  isoprenaline hydrochloride (ISO) for 20min. Data were analyzed by two-tailed Student's *t*-test (**A-G, J, K**) or ANOVA (**H, I**). \* $P<0.05$ , \*\* $P<0.01$ . All values represent the mean  $\pm$  s.e.m.

# Supplemental Figure 1

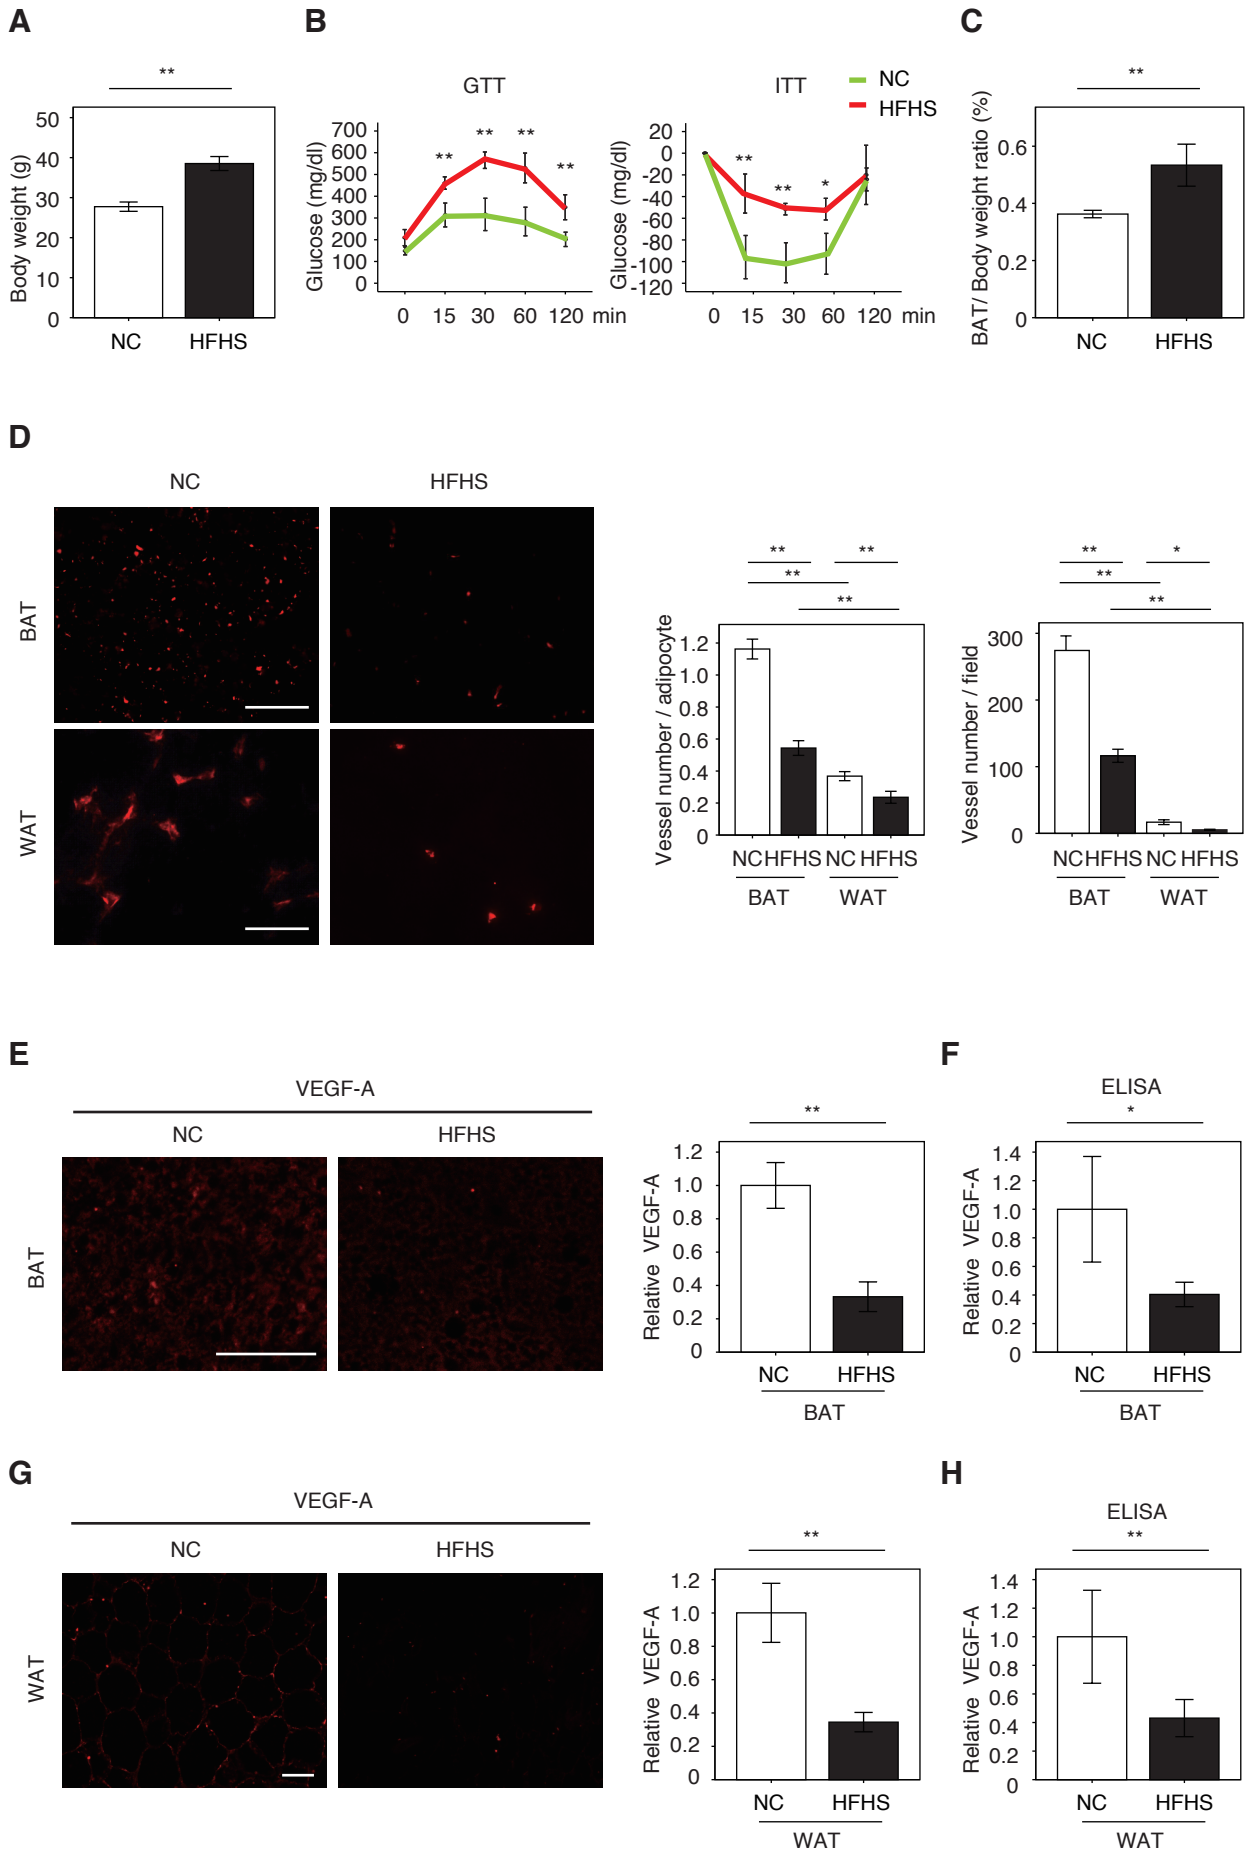

## Supplemental Figure 2

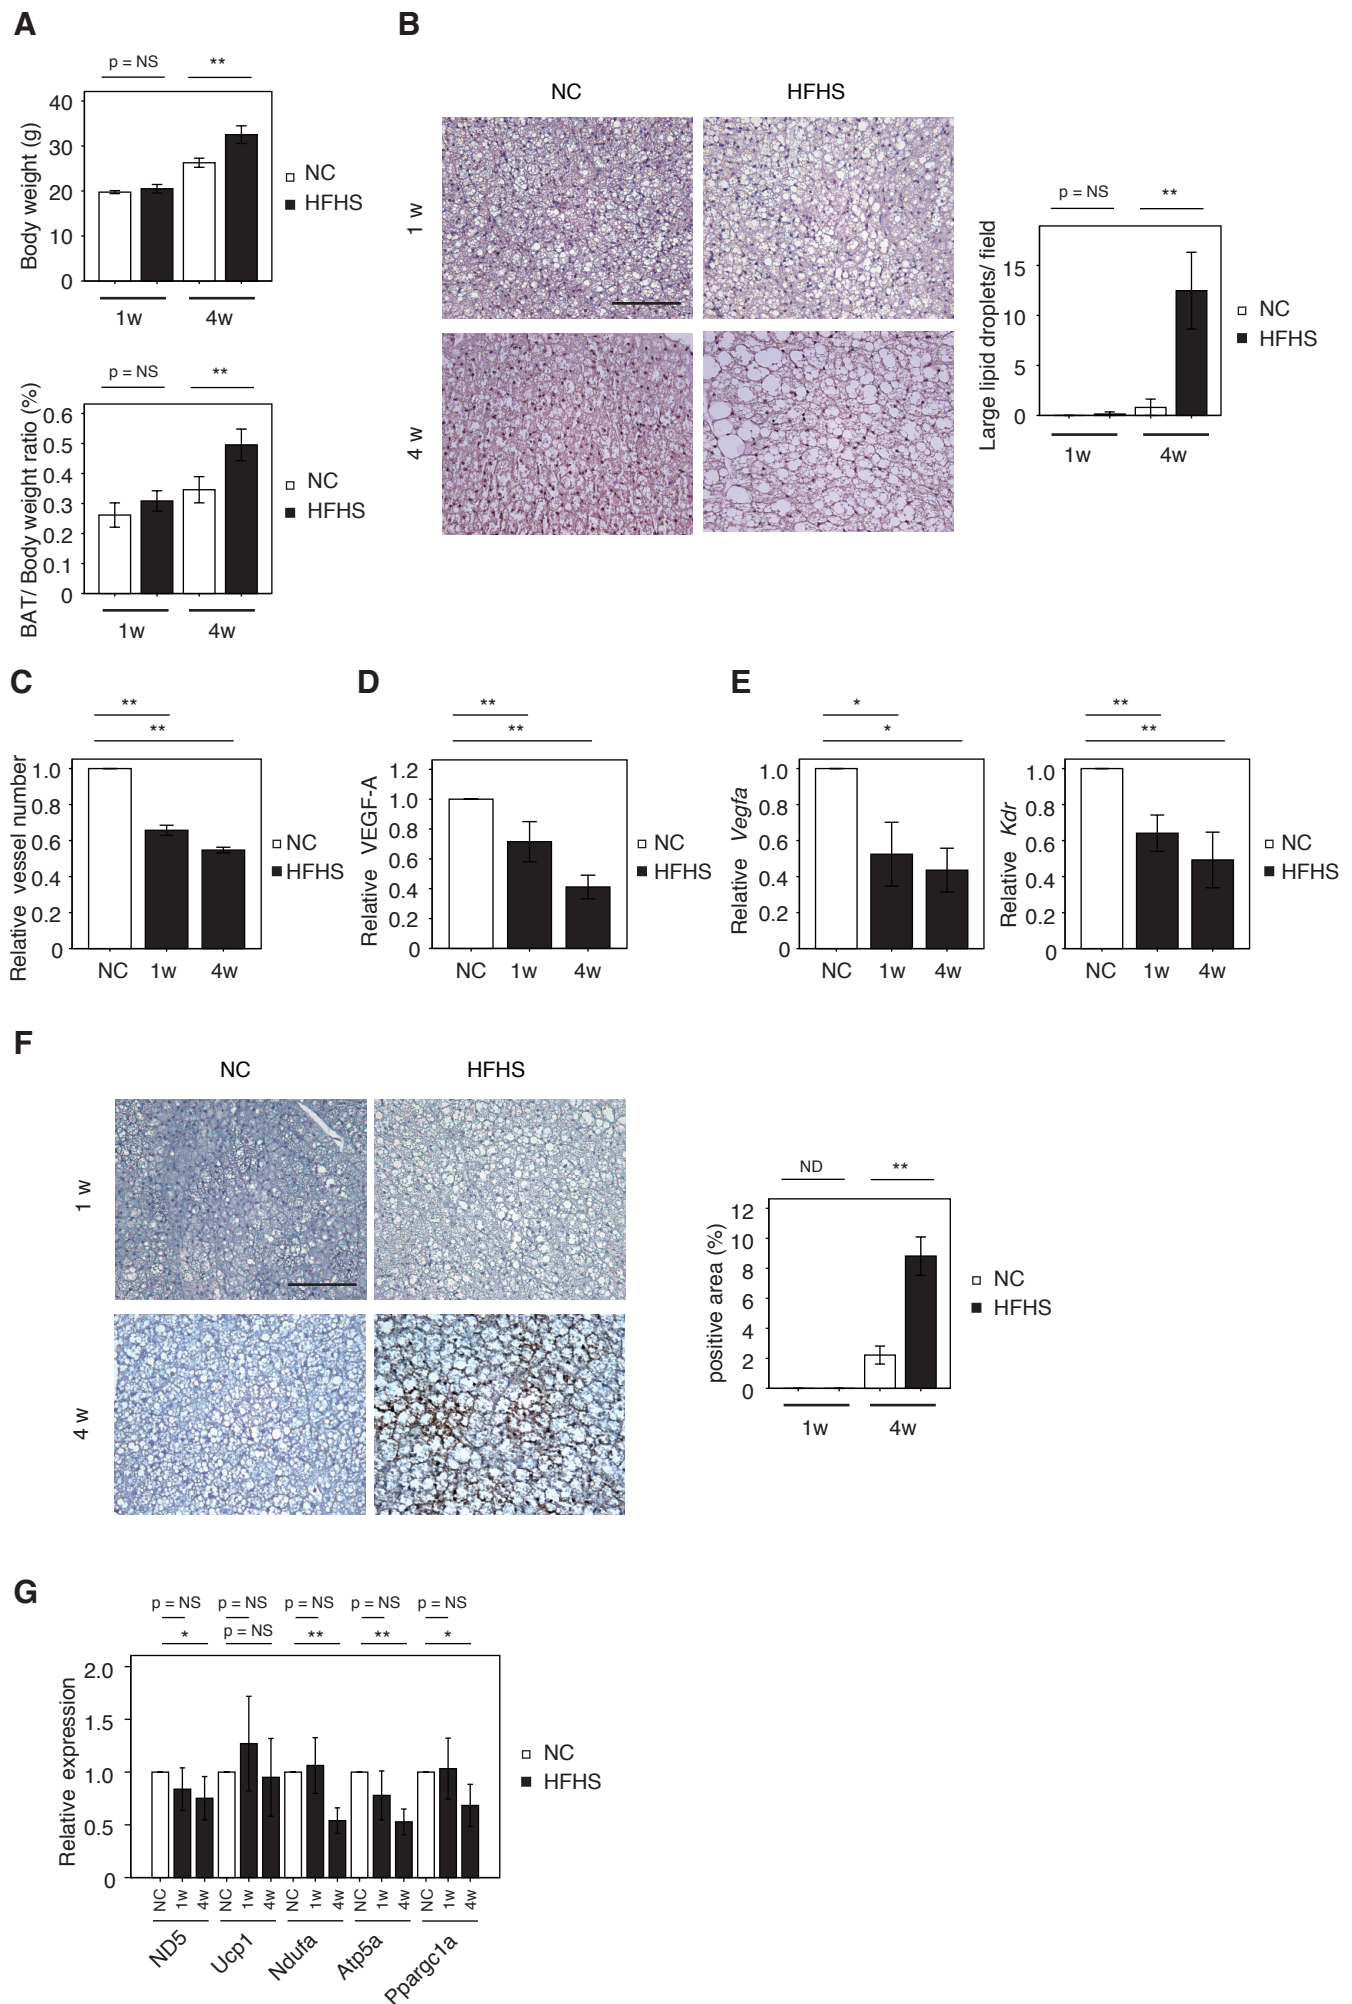

# Supplemental Figure 3

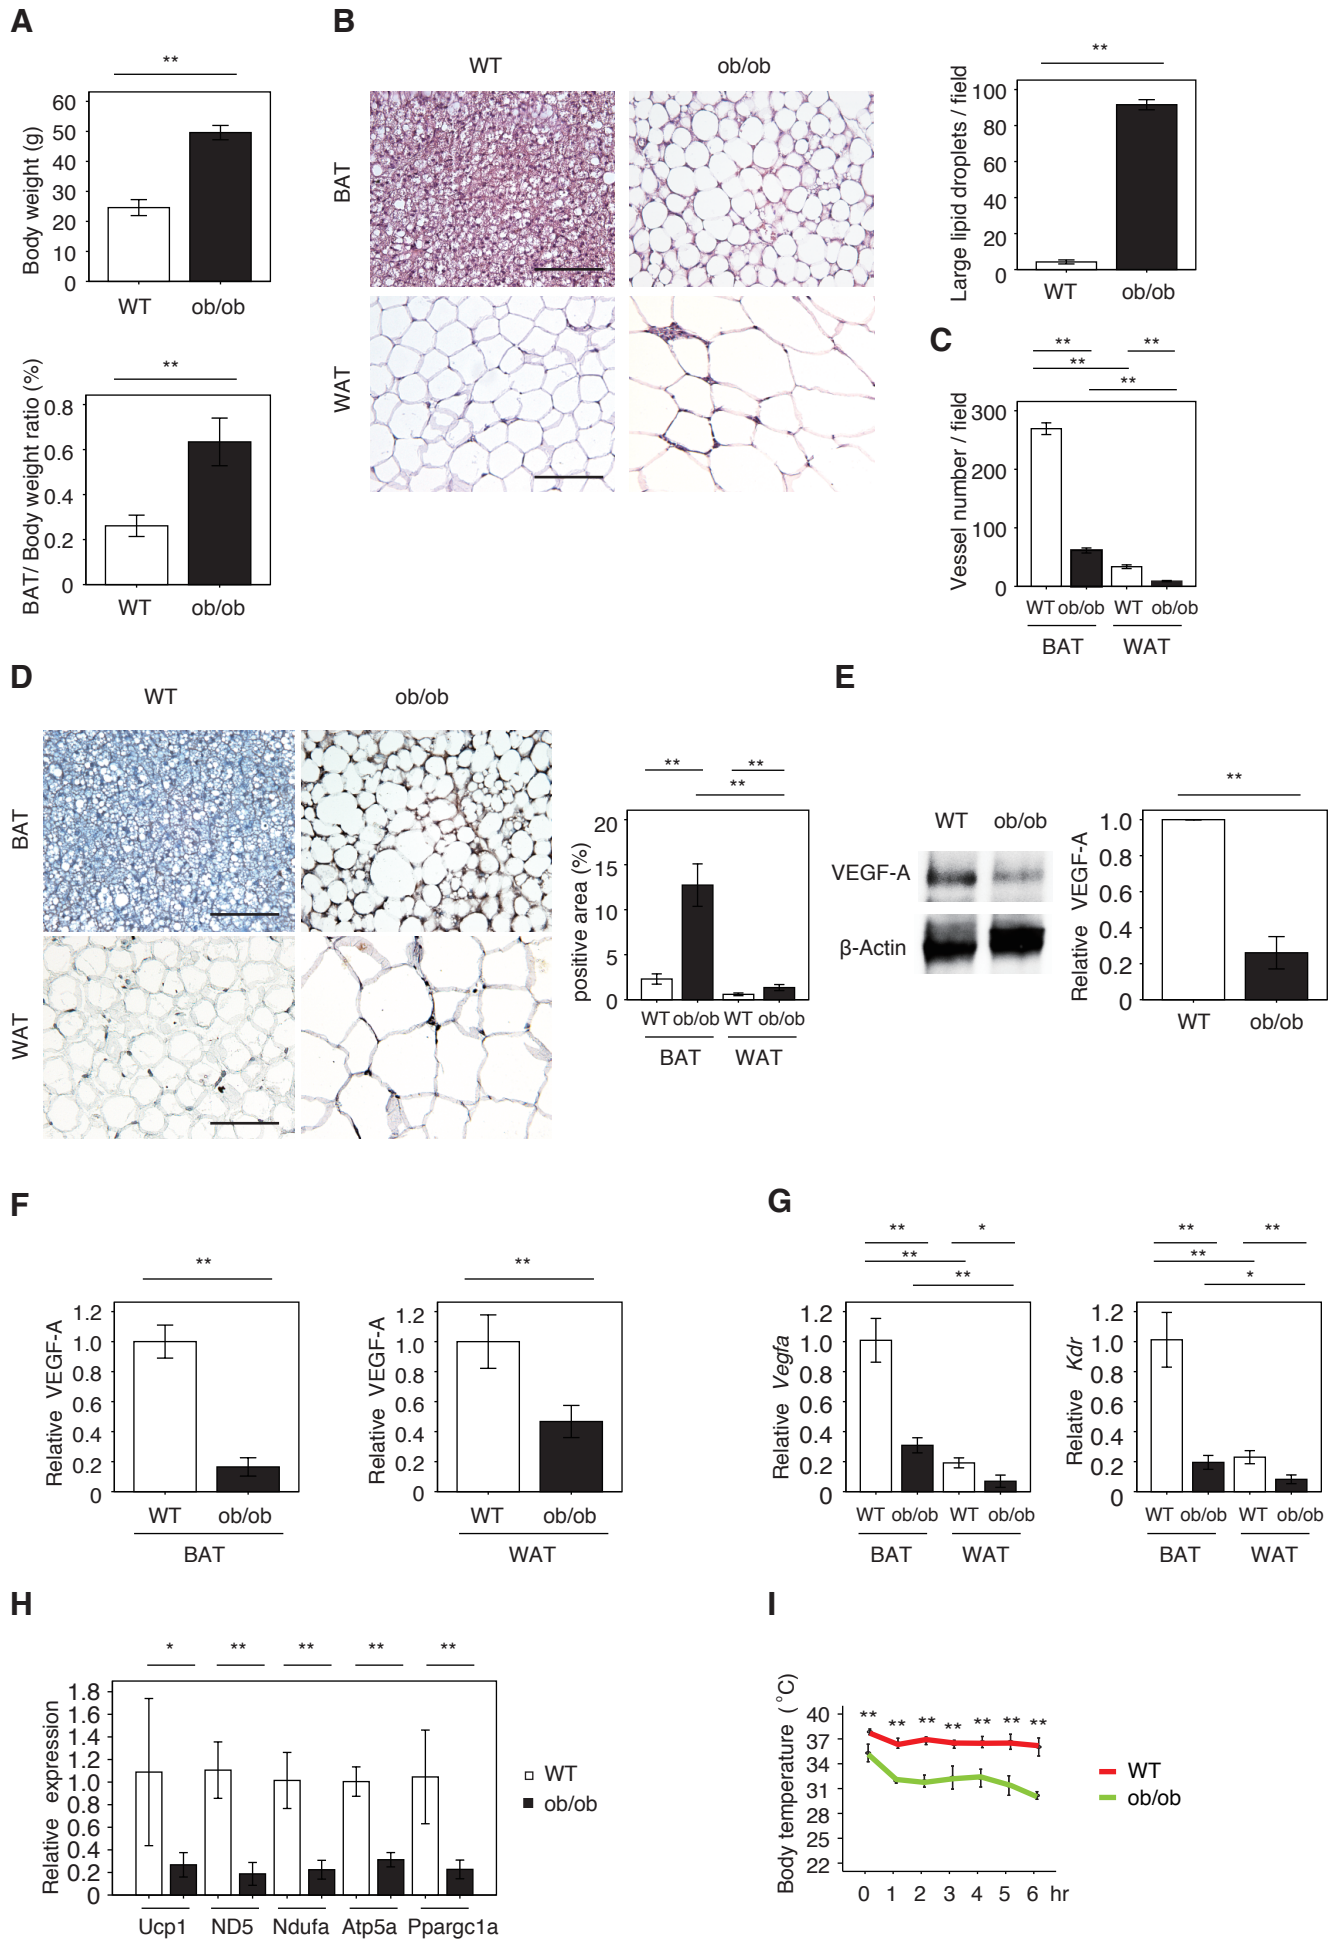



# Supplemental Figure 4

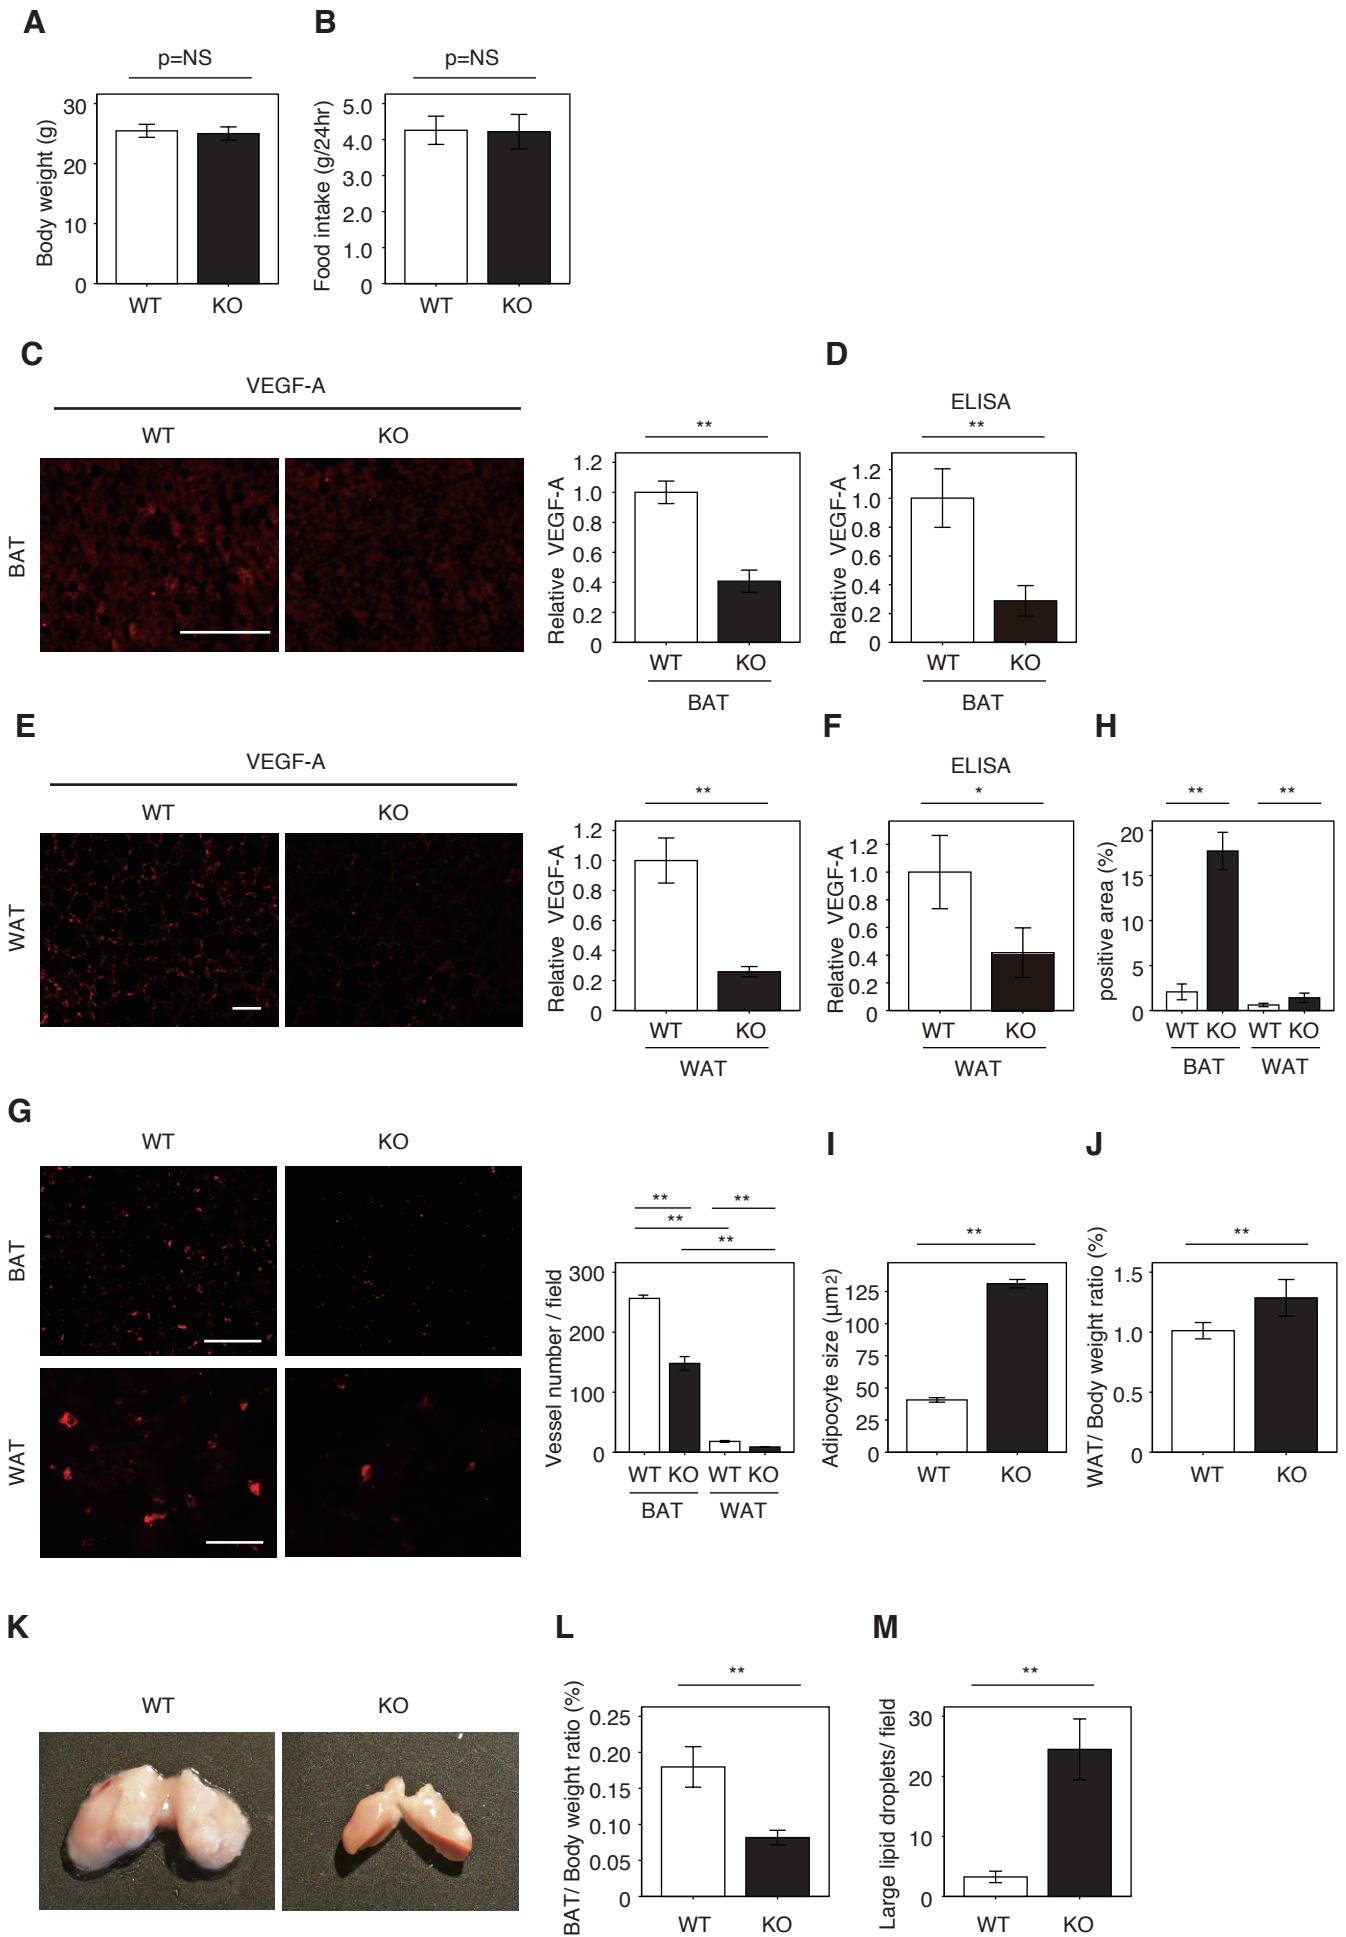



# Supplemental Figure 5

**A**

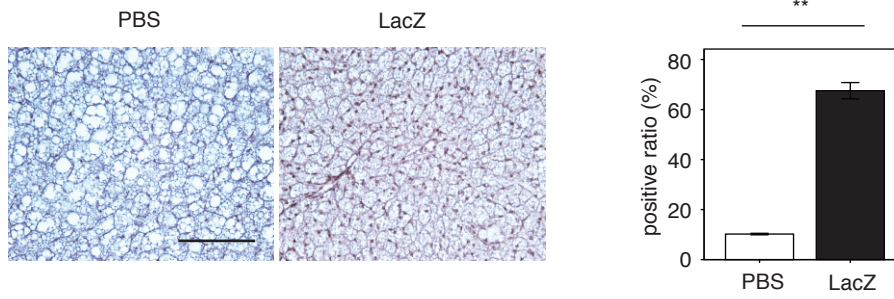

**B**

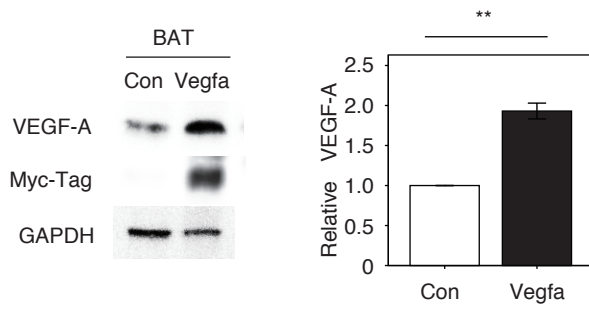

**C**

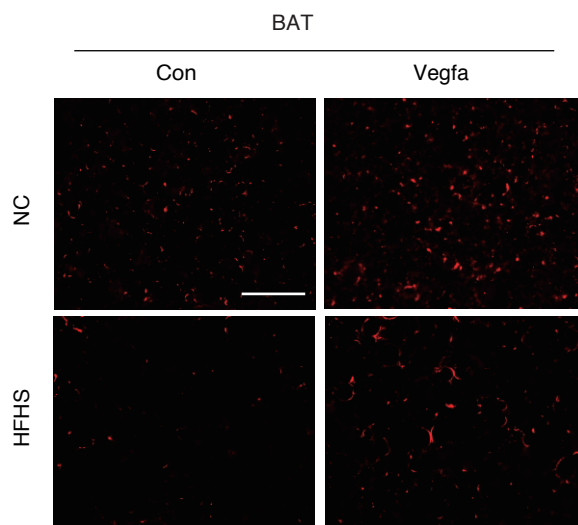

**D**

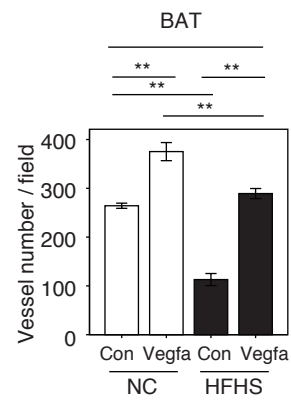

# Supplemental Figure 6

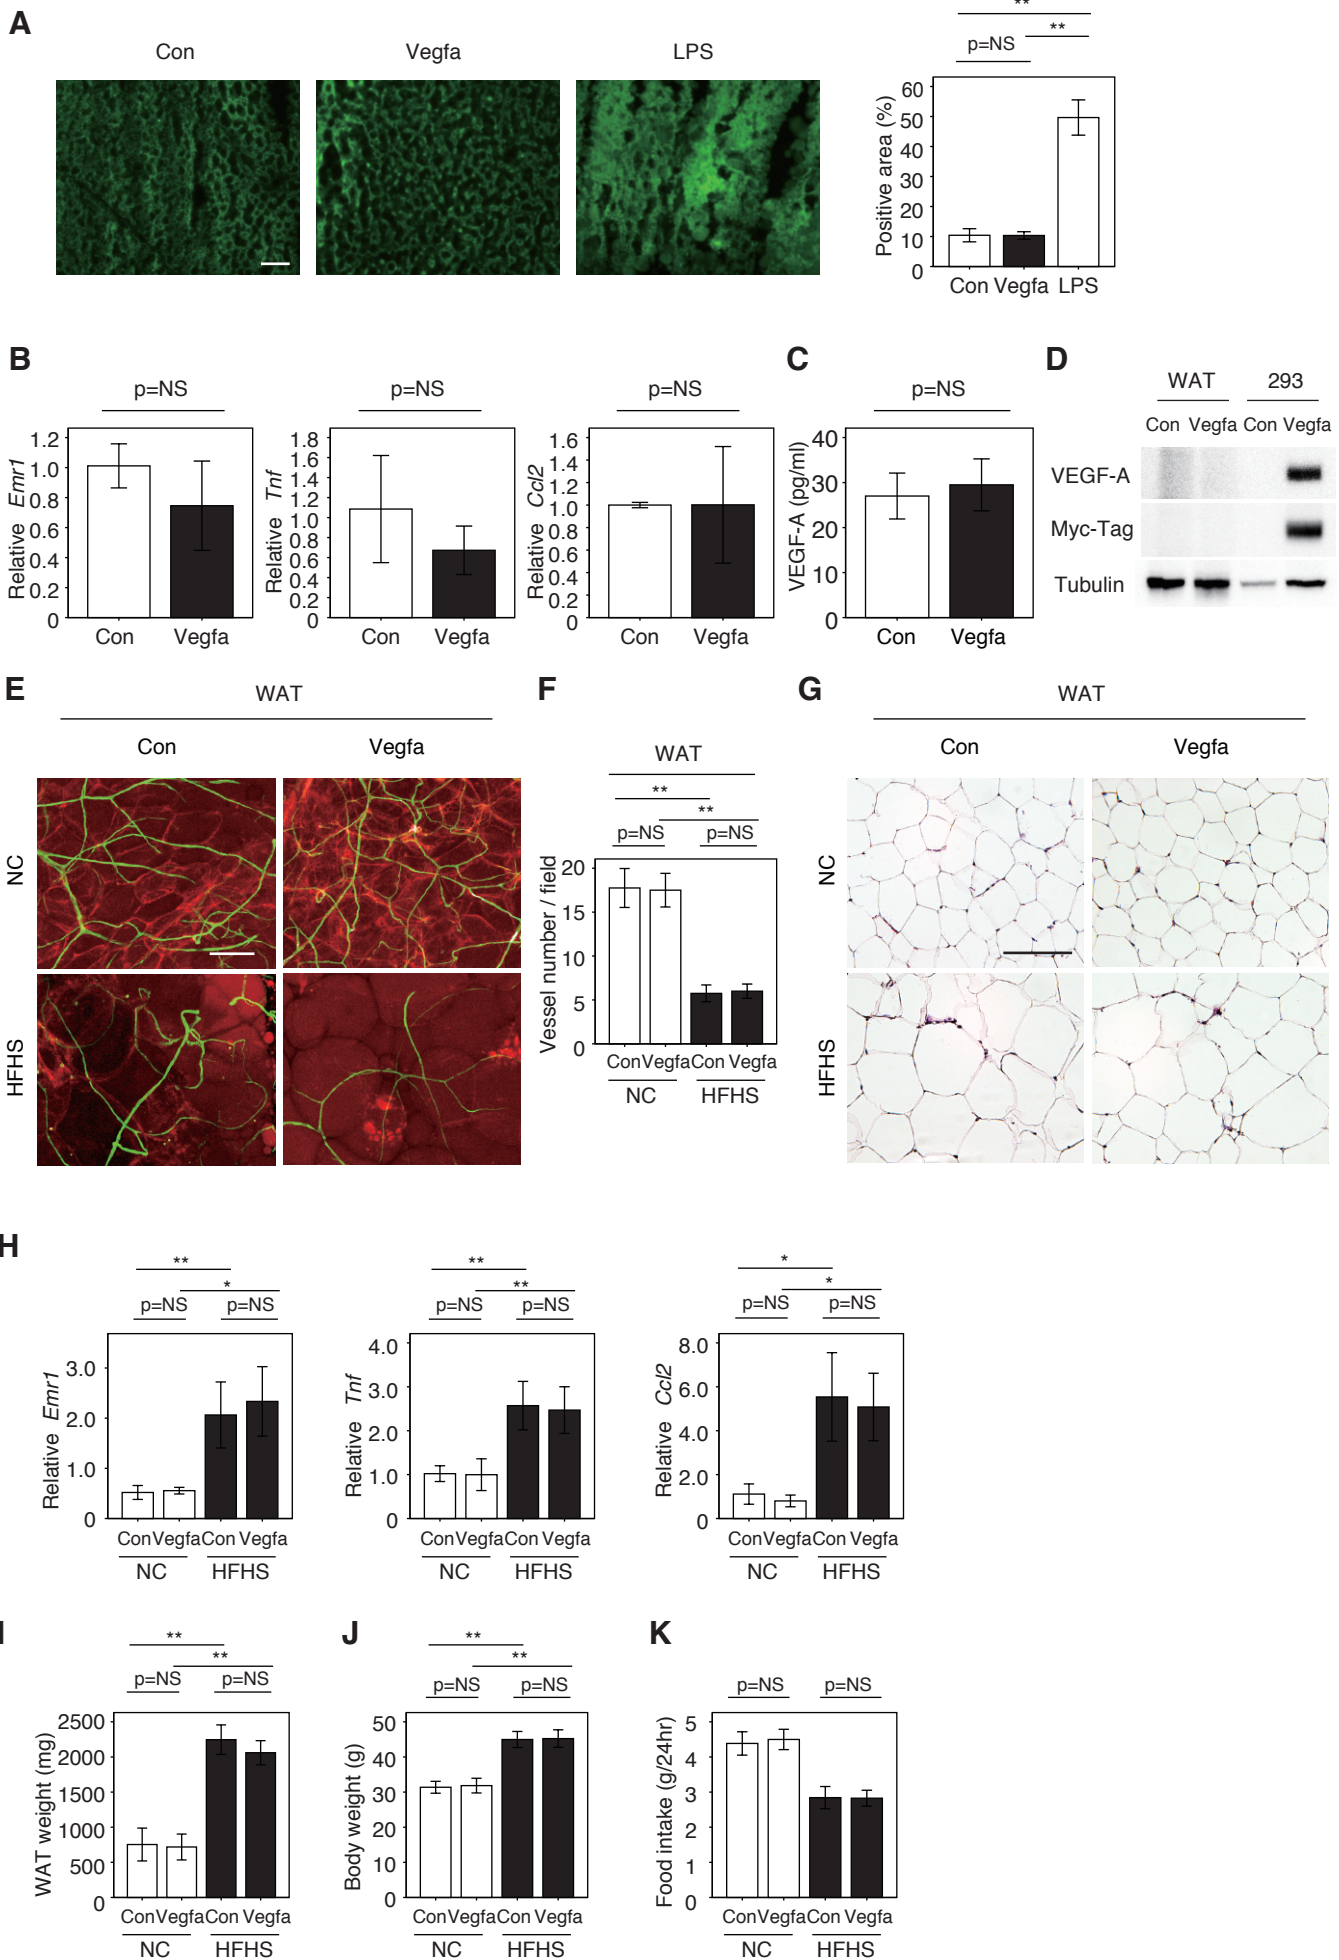

# Supplemental Figure 7

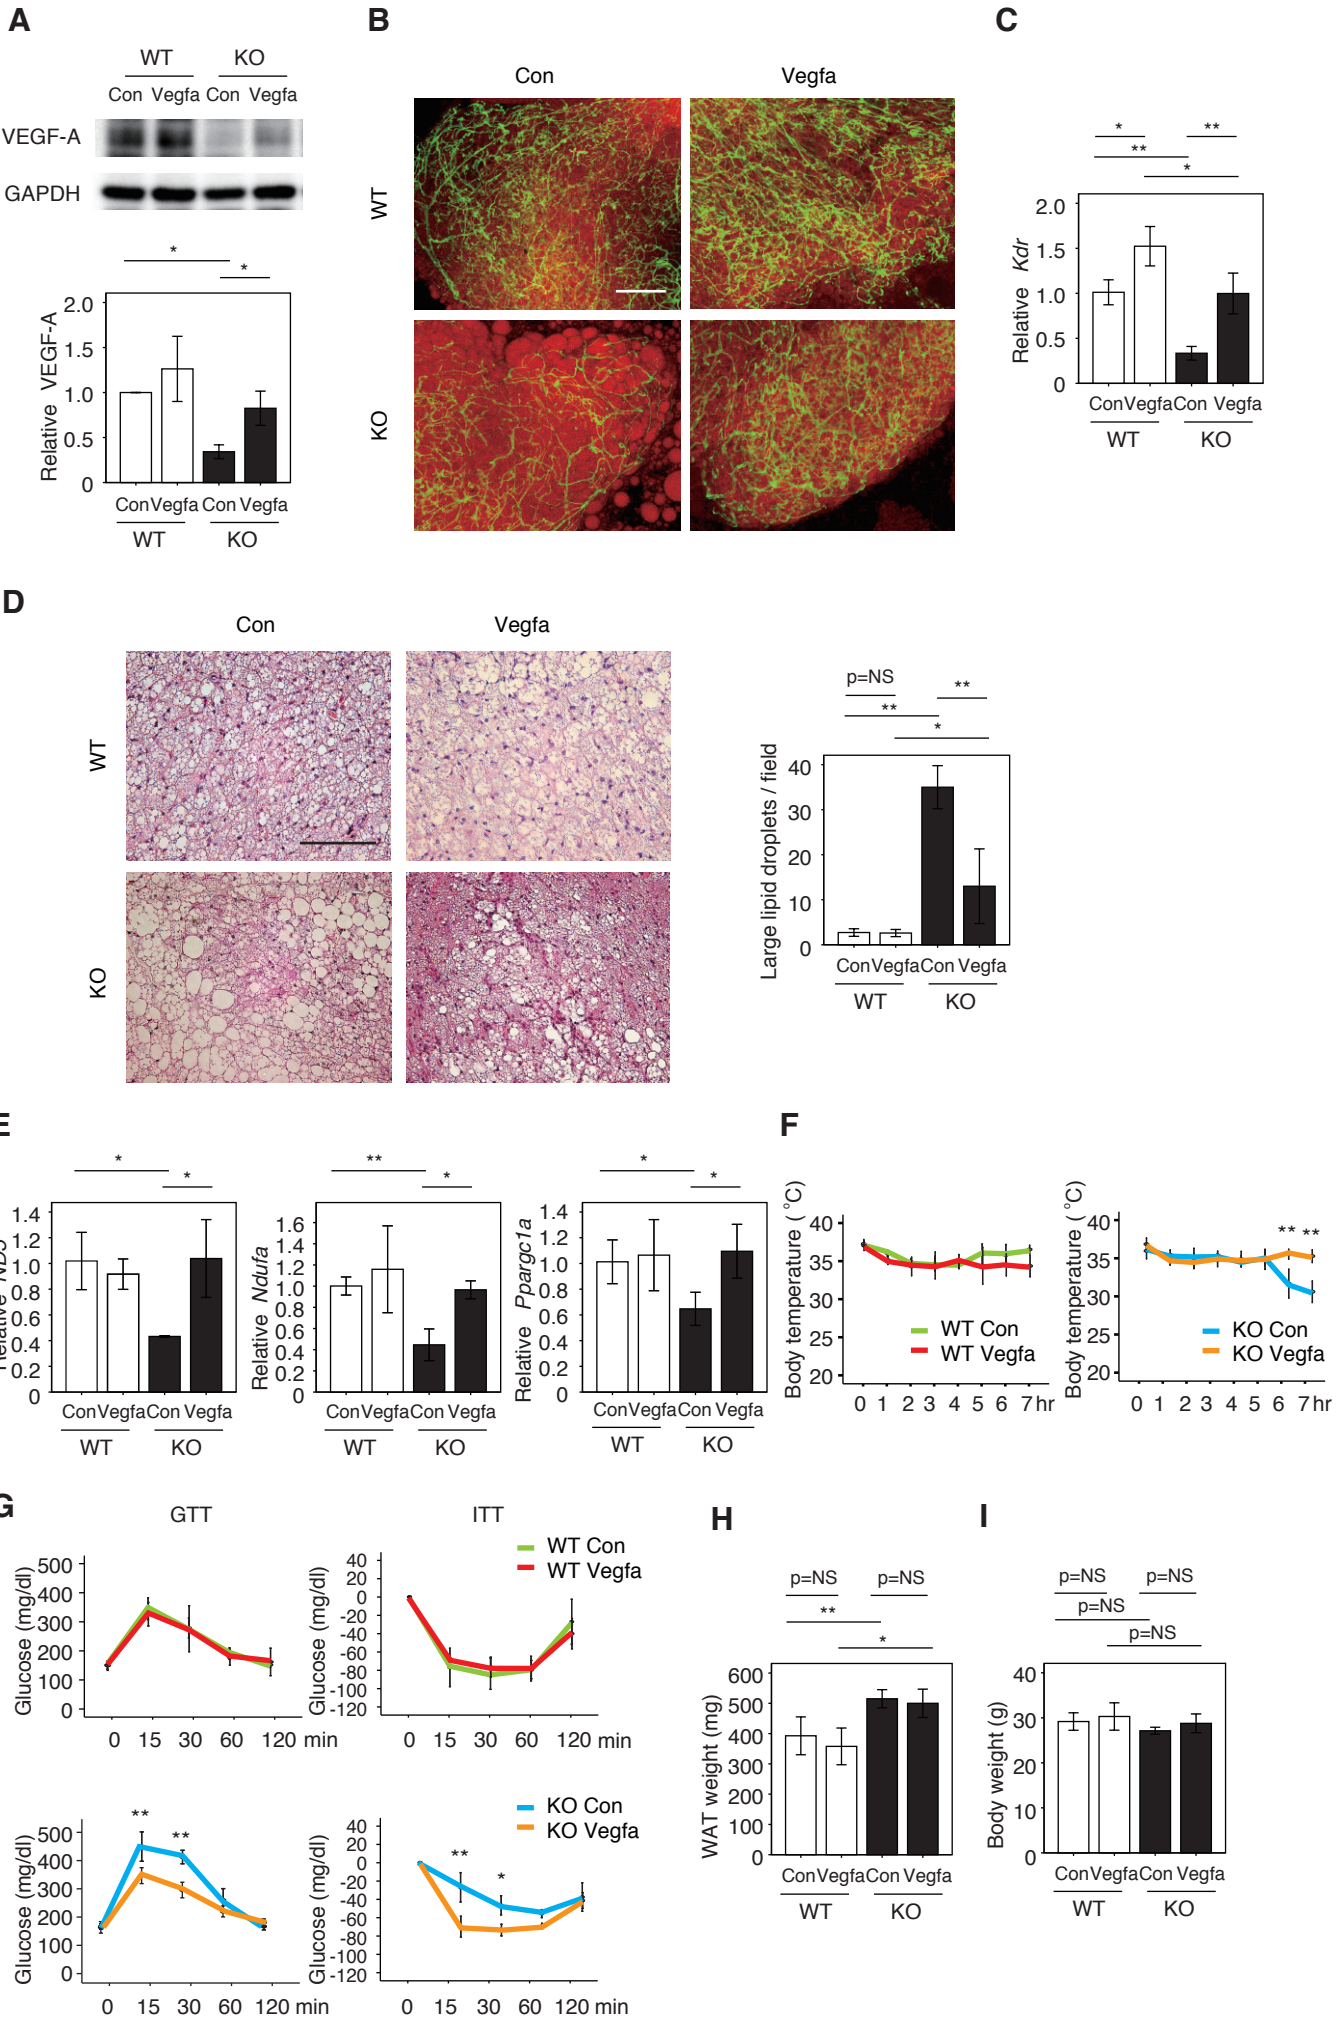

# Supplemental Figure 8

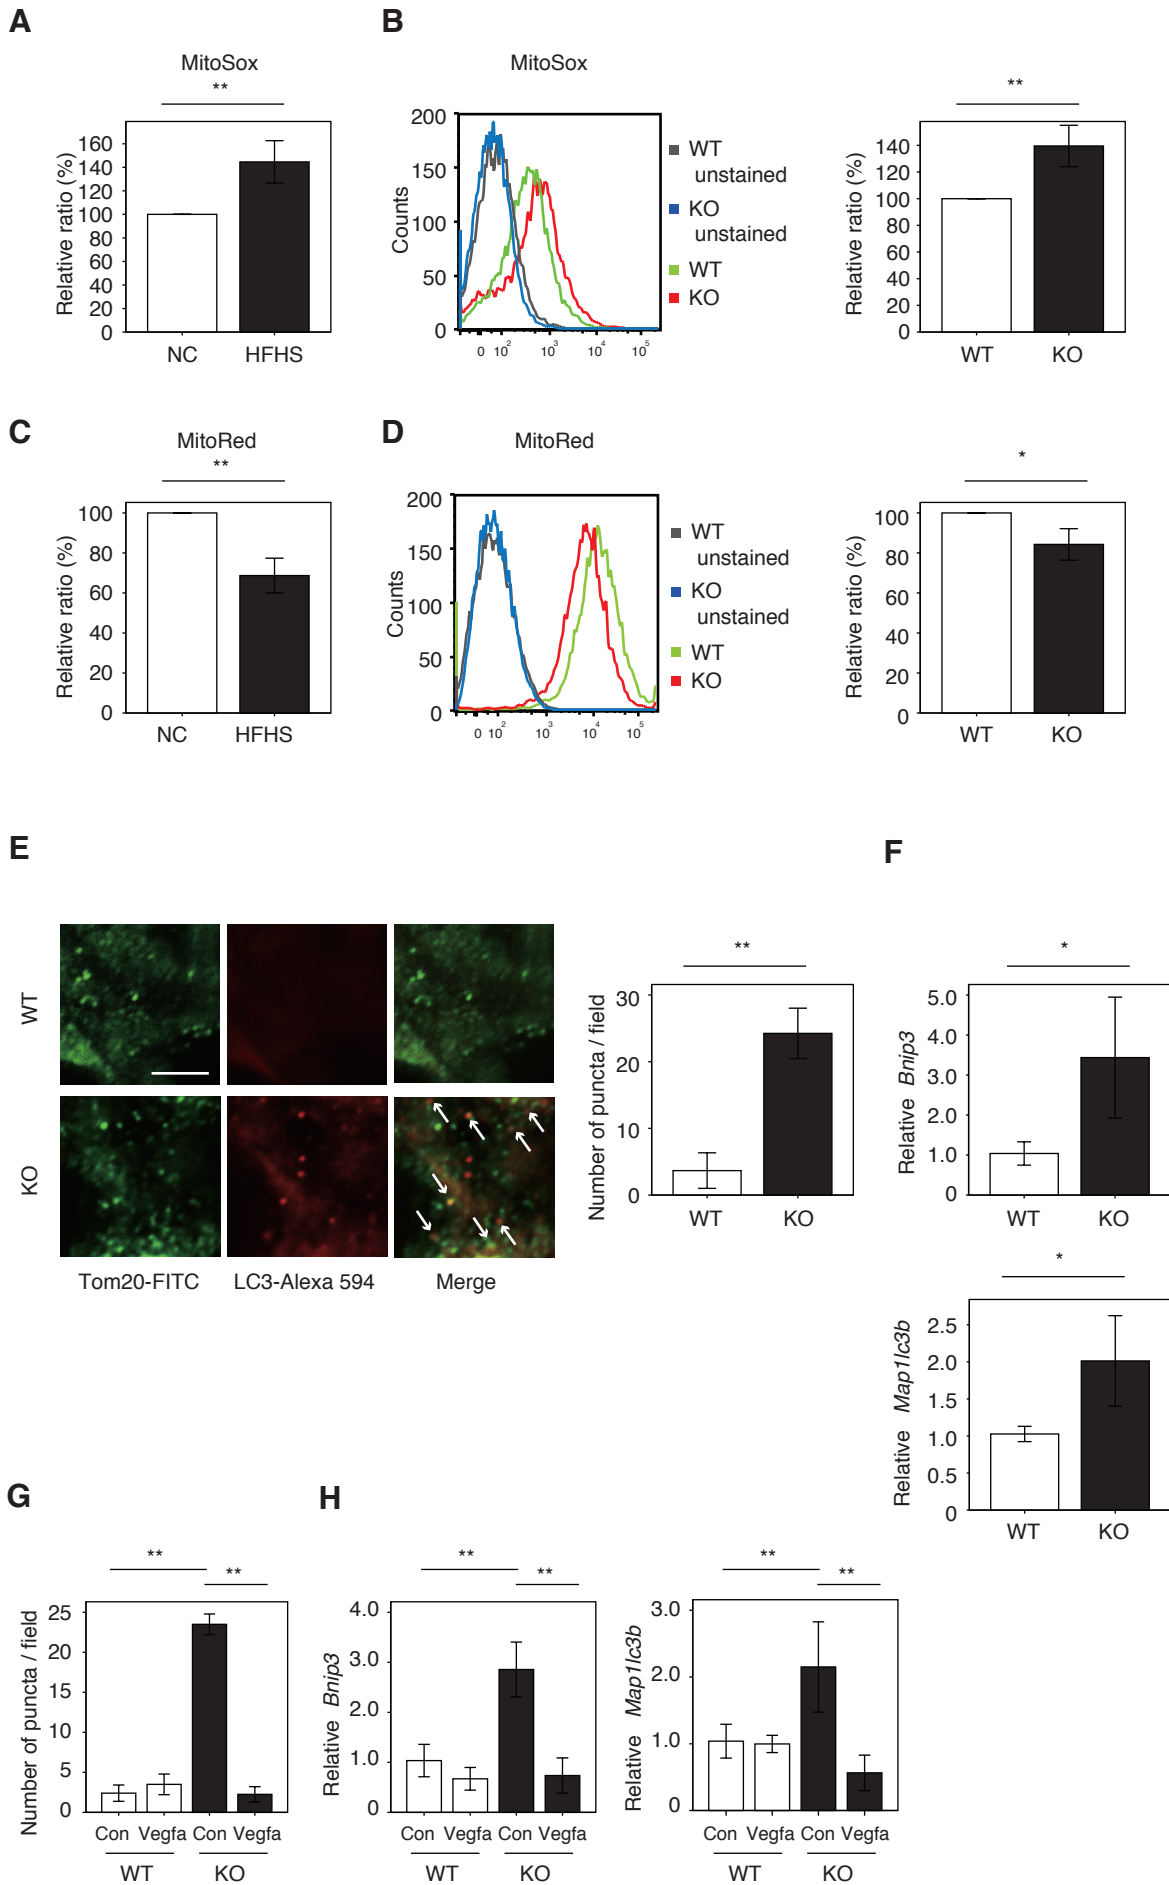



# Supplemental Figure 9

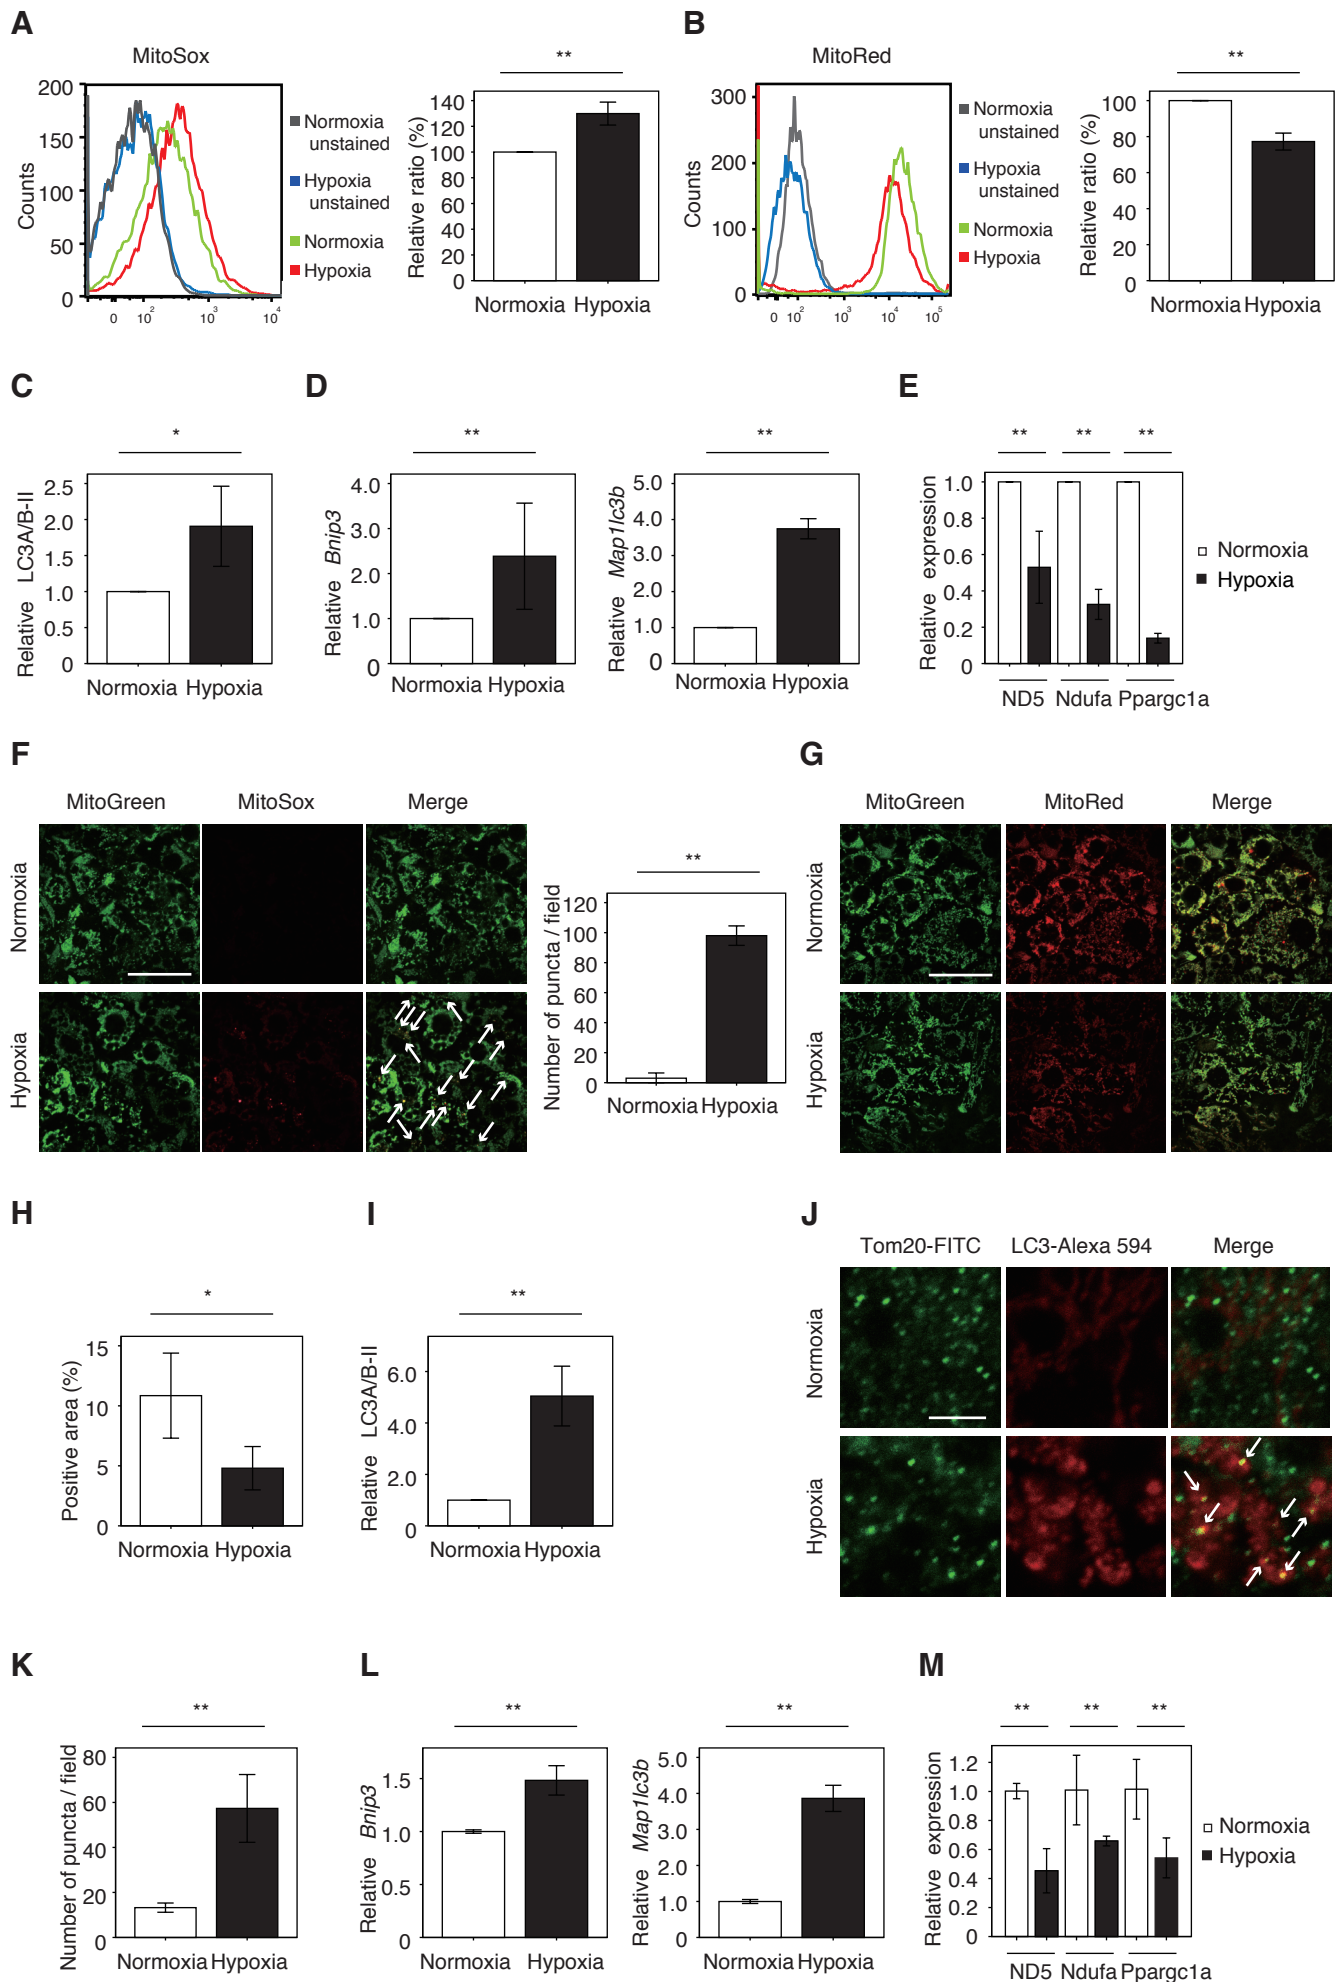

# Supplemental Figure 10

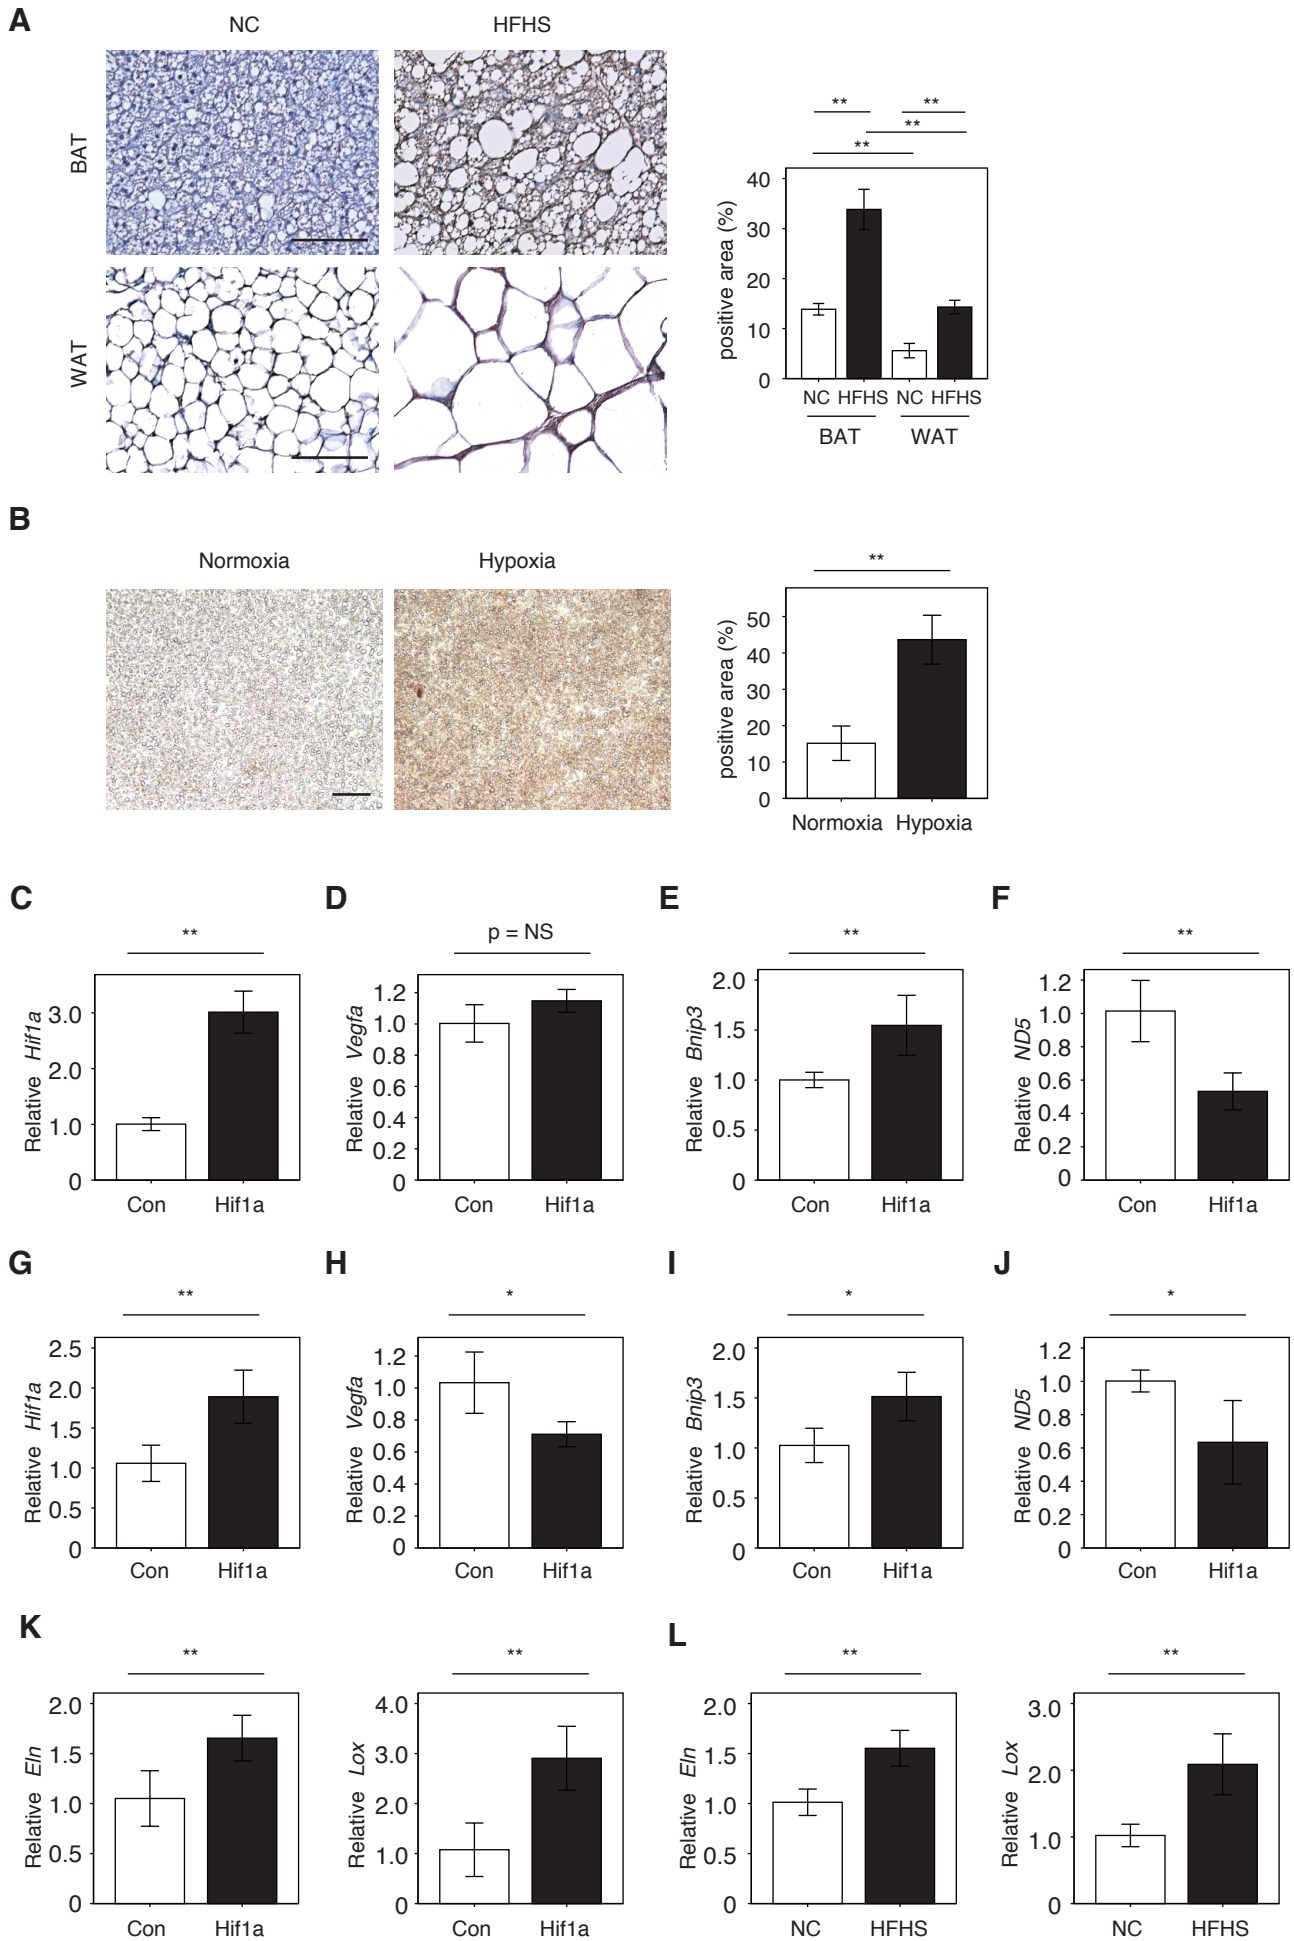

# Supplemental Figure 11

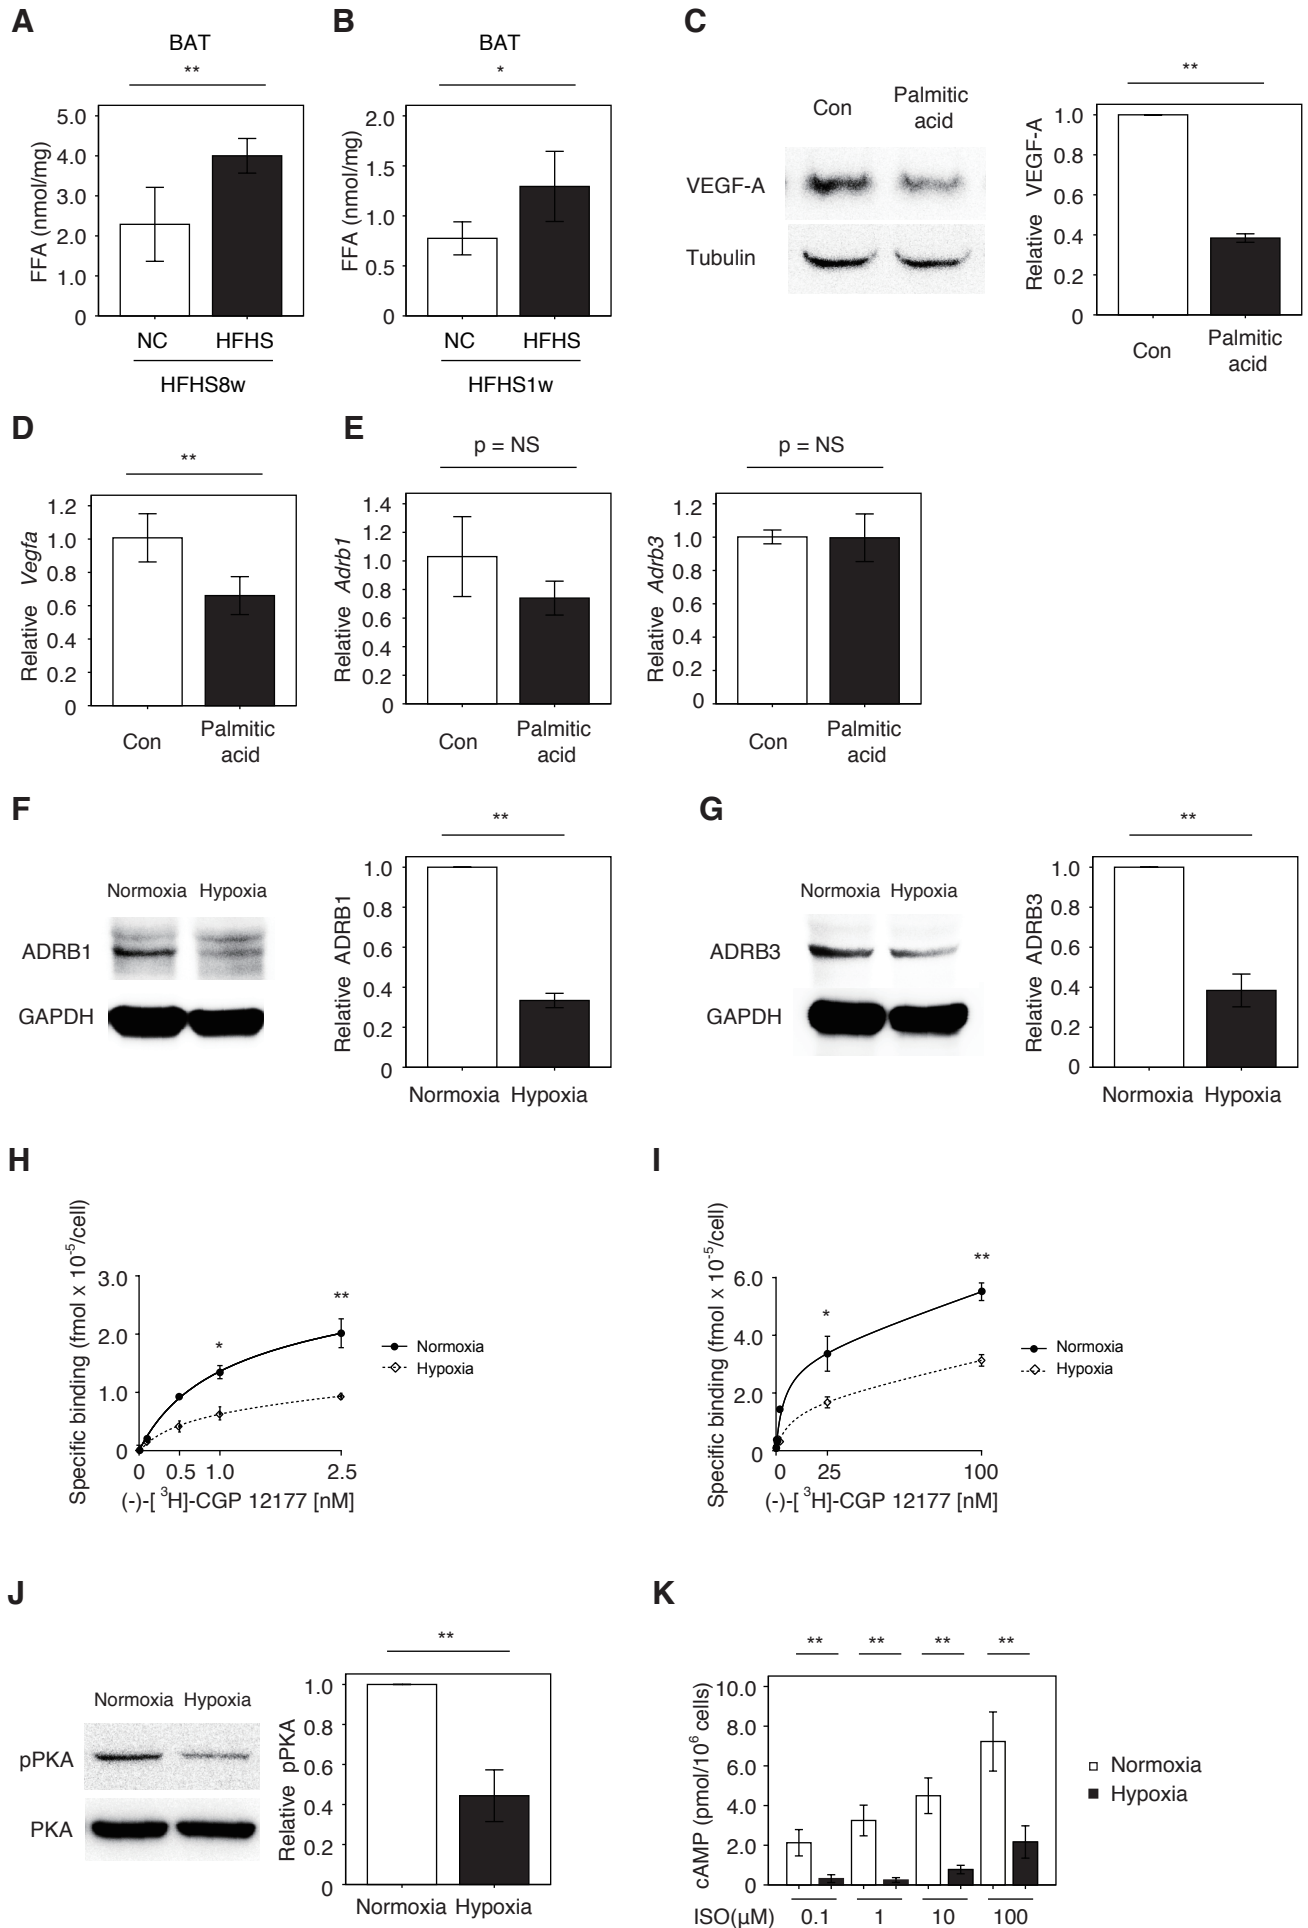

Supplement: JCI71643sd.pdf [file JCI71643sd.pdf]
